# Supplementary material
Source: PubMed Central journal article supplement (PMC4164493)
Supplement: epi-9-1083-s01.pdf [file epi-9-1083-s01.pdf]

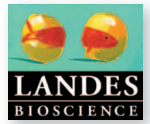

## **Supplemental Material to:**

**Heather H Burris, Andrea A Baccarelli, Valeria Motta,  
Hyang-Min Byun, Allan C Just, Adriana Mercado-Garcia,  
Joel Schwartz, Katherine Svensson, Martha M Téllez-Rojo,  
and Robert O Wright**

**Association between length of gestation and cervical  
DNA methylation of PTGER2 and LINE 1-HS**

**Epigenetics 2014; 9(8)**

**<http://dx.doi.org/10.4161/epi.29170>**

**[http://www.landesbioscience.com/journals/epigenetics/  
article/29170/](http://www.landesbioscience.com/journals/epigenetics/article/29170/)**

# PTGER2 gene map

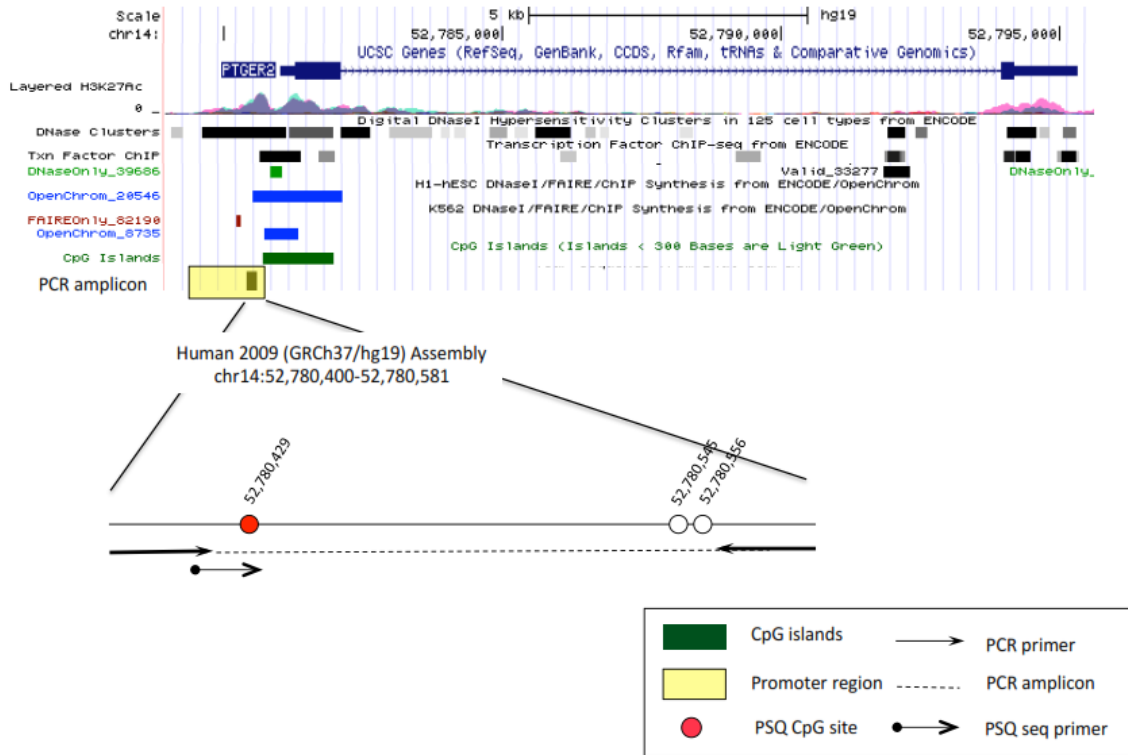

**Figure S1.** Prostaglandin E receptor 2 (subtype EP2) gene map.

**Table S1.** Prostaglandin E receptor 2 (subtype EP2) pyrosequencing primers, promoter and amplicon (based on hg19)

| Gene                                                   | Chromosome | Promoter     |            | Amplicon     |            | CpGs (position) | Primers and Sequences analyzed                                                                                                                                                                            |
|--------------------------------------------------------|------------|--------------|------------|--------------|------------|-----------------|-----------------------------------------------------------------------------------------------------------------------------------------------------------------------------------------------------------|
|                                                        |            | <i>Start</i> | <i>End</i> | <i>Start</i> | <i>End</i> |                 |                                                                                                                                                                                                           |
| prostaglandin E receptor 2 (subtype EP2) <i>PTGER2</i> | 14         | 52,779,162   | 52,780,571 | 52,780,400   | 52,780,581 | 52,780,429      | Primer Forward:<br>TGGTTTTTTGGATGGAT<br>ATATTTGT<br>Primer Reverse:<br>bio-<br>AATAAAATTAAAAAAA<br>CCAATCCC<br>Primer Sequencing:<br>GATATATTTGTTTAA<br>Sequence to analyze:<br>C/TGTTTTATTTTAATTT<br>TTG |
